# Supplementary material
Source: PubMed Central journal article supplement (PMC5046839)
Supplement: NIHMS811407-supplement-1.pdf [file NIHMS811407-supplement-1.pdf]

# Supplementary Information for “A competitive trade-off limits the selective advantage of increased antibiotic production”

---

*Ylaine Gerardin<sup>1</sup>, Michael Springer<sup>1,\*</sup> & Roy Kishony<sup>2,\*</sup>*

<sup>1</sup>*Department of Systems Biology, Harvard Medical School, Boston, Massachusetts 02115, USA*

<sup>2</sup>*Faculty of Biology and Faculty of Computer Science, Technion – Israel Institute of Technology, Haifa, Israel*

*\*Co-corresponding authors*

## Supplementary Figures

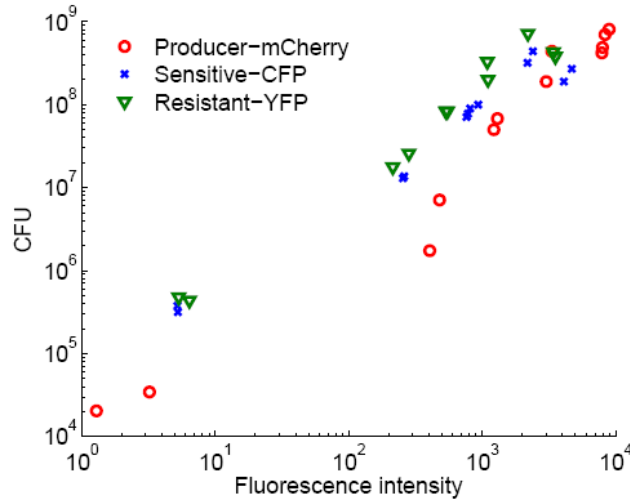

**Supplementary Figure 1. Total fluorescence intensity is a good proxy for CFU for measuring colony growth.** Individual colonies of each strain were assayed by imaging (calculating fluorescence intensity using the image processing pipeline, see Methods) and by counting colony-forming units (CFU).

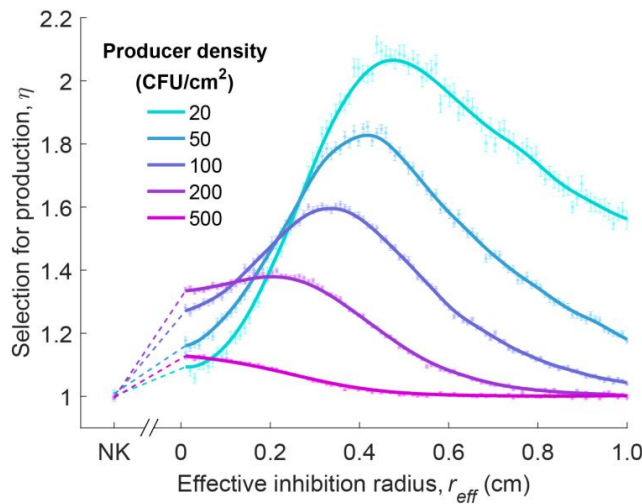

**Supplementary Figure 2. Simulations accounting for the cooperative effect of toxicity from nearby producer colonies acting as instantaneous point sources of diffusing antibiotic.** Selection for antibiotic production as a function of the effective inhibition radius  $r_{eff}$ , the distance at which the antibiotic concentration equals  $MIC$  for an isolated producer colony. NK corresponds to no production,  $c=0$ . Parameters are the same as in Figure 3c with the addition of  $\sigma=0.25$ ,  $MIC=1$ , and  $c=2\pi\sigma^2 MIC * \exp(r_{eff}^2/2\sigma^2)$ . Mean of  $n=50$  simulation runs per parameter set, error bars show s.e.m.).

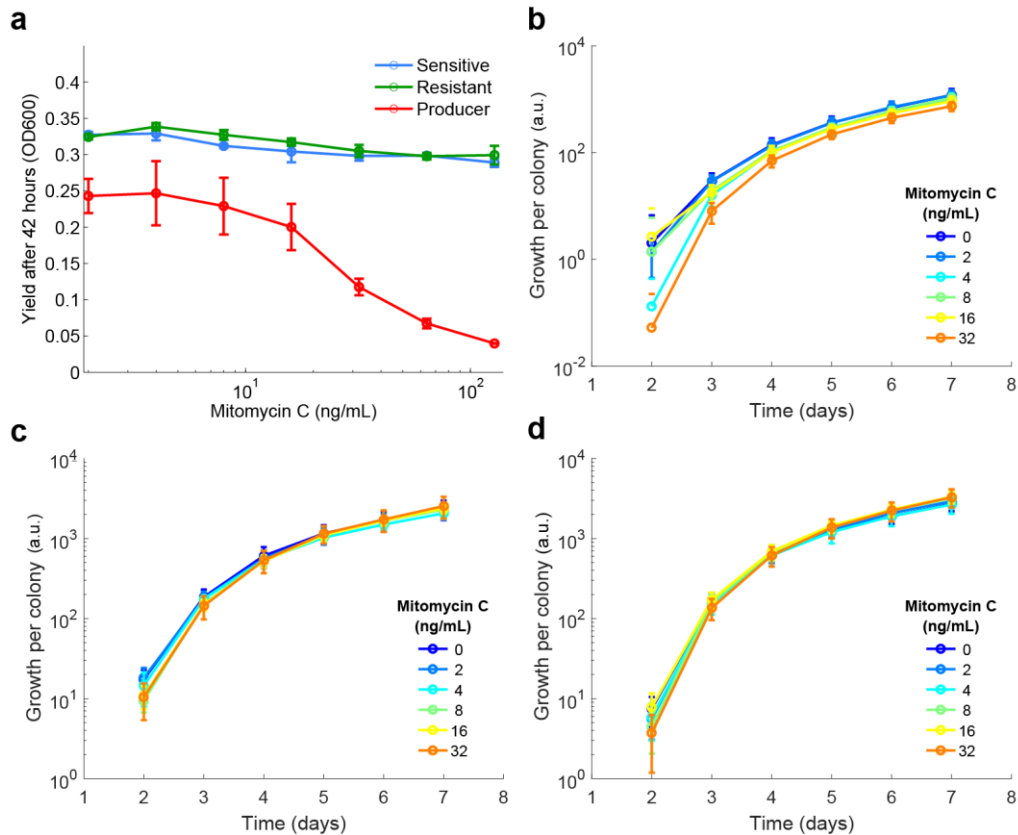

**Supplementary Figure 3. Growth of single strains with varying concentrations of mitomycin C.** **a**, Mean growth in liquid culture, showing that mitomycin C reduces producer yield at concentrations where non-producing strains are not significantly affected ( $n=4$  wells per condition, error bars show standard deviation). **b-d**, Mean growth (arbitrary units) of colonies on solid media ( $n=30-50$  colonies per condition, error bars show s.d.). **b**, Producer-mCherry. **c**, Resistant-YFP. **d**, Sensitive-CFP.

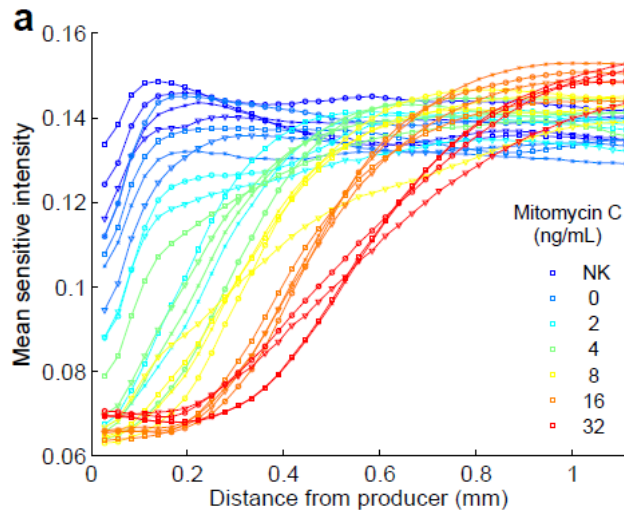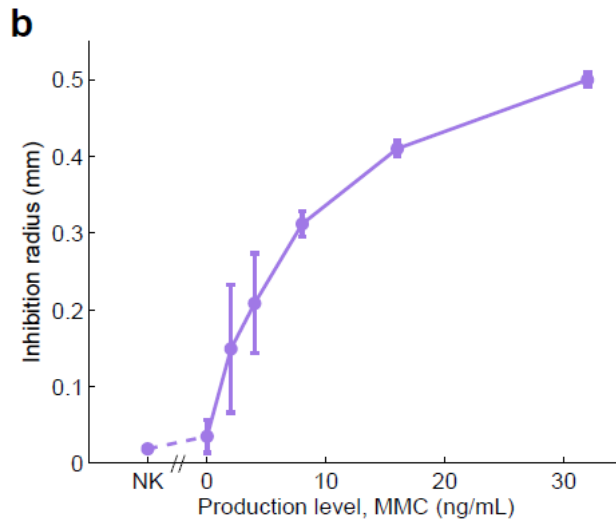

**Supplementary Figure 4. Varying mitomycin C concentration tunes the size of inhibition zones. a,** Mean fluorescence intensity in the sensitive channel (CFP) decreases in proximity to producer colonies (each trace is an individual plate image with  $[P] = 2 \text{ CFU/cm}^2$ ,  $[S] = 2,000 \text{ CFU/cm}^2$ , 4 plates per condition). **b,** Mean inhibition radius increases with the amount of colicin induction via mitomycin C ( $n=4$  plates per condition, error bars show s.d.).

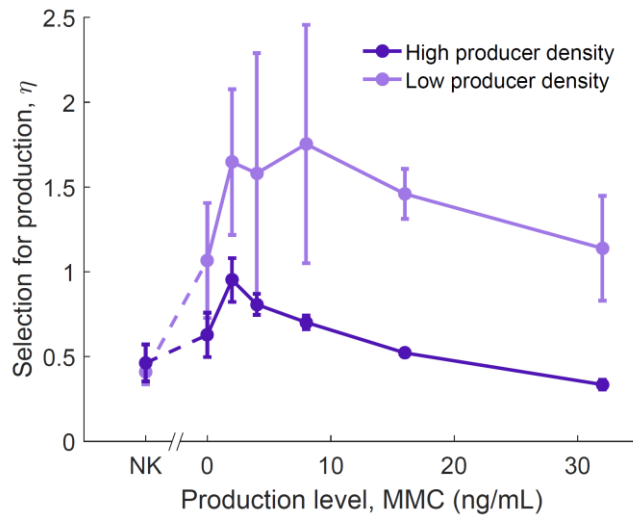

**Supplementary Figure 5. Confirmation of optimal production level in dye-swapped experiment.** The experiment in Figure 4a was replicated using YFP-marked producers and mCherry-marked cheater strains. All other experimental conditions are the same (n=4 plates per condition, error bars show s.d.).

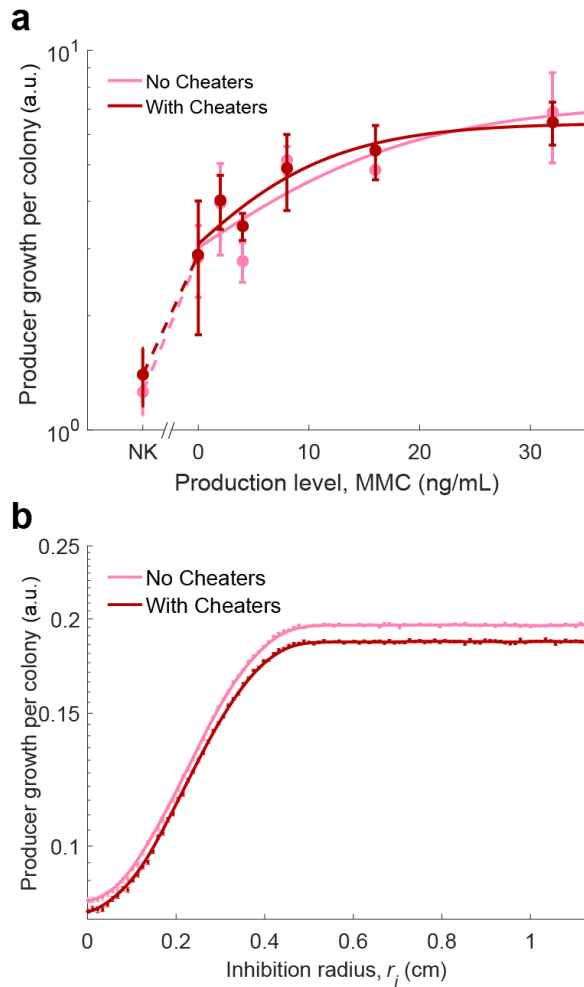

**Supplementary Figure 6. Producer growth plateaus with and without cheaters.** **a**, Mean growth (arbitrary units) of producer colonies in experimental competitions ( $[S]=2,000$  CFU/cm<sup>2</sup>,  $[P]=20$  CFU/cm<sup>2</sup>,  $[C]=0$  or 20 CFU/cm<sup>2</sup>; mean of 4 replicate plates for each point, error bars show s.d.). **b**, Mean growth (arbitrary units) in model simulations ( $[P] = 0.5$  CFU/cm<sup>2</sup>,  $[C]=0$  or 0.5 CFU/cm<sup>2</sup>, all other parameters as in Figure 3c; mean of 50 simulation runs, error bars show s.e.m.). Growth units are arbitrary.

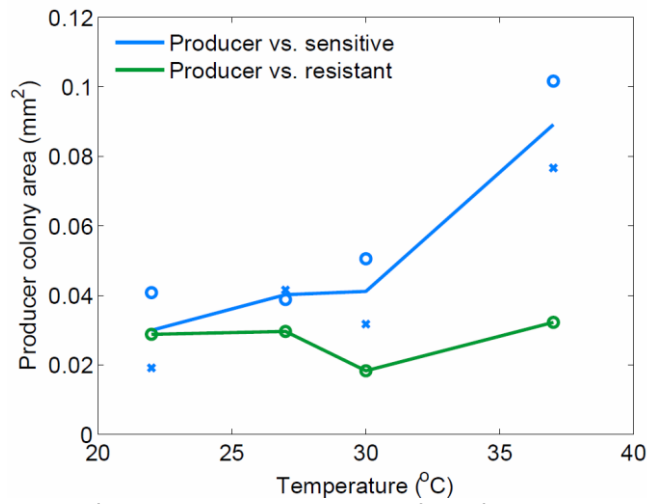

**Supplementary Figure 7. Colicin expression is temperature-dependent.** Mean growth of producer colonies in competition with sensitive or resistant competitors at varying temperatures. [P]=8 CFU/cm<sup>2</sup>, [S] or [R] =2000 CFU/cm<sup>2</sup>, [mitomycin C]=0, n=2 replicate plates for producer versus sensitive and n=1 for producer versus resistant.

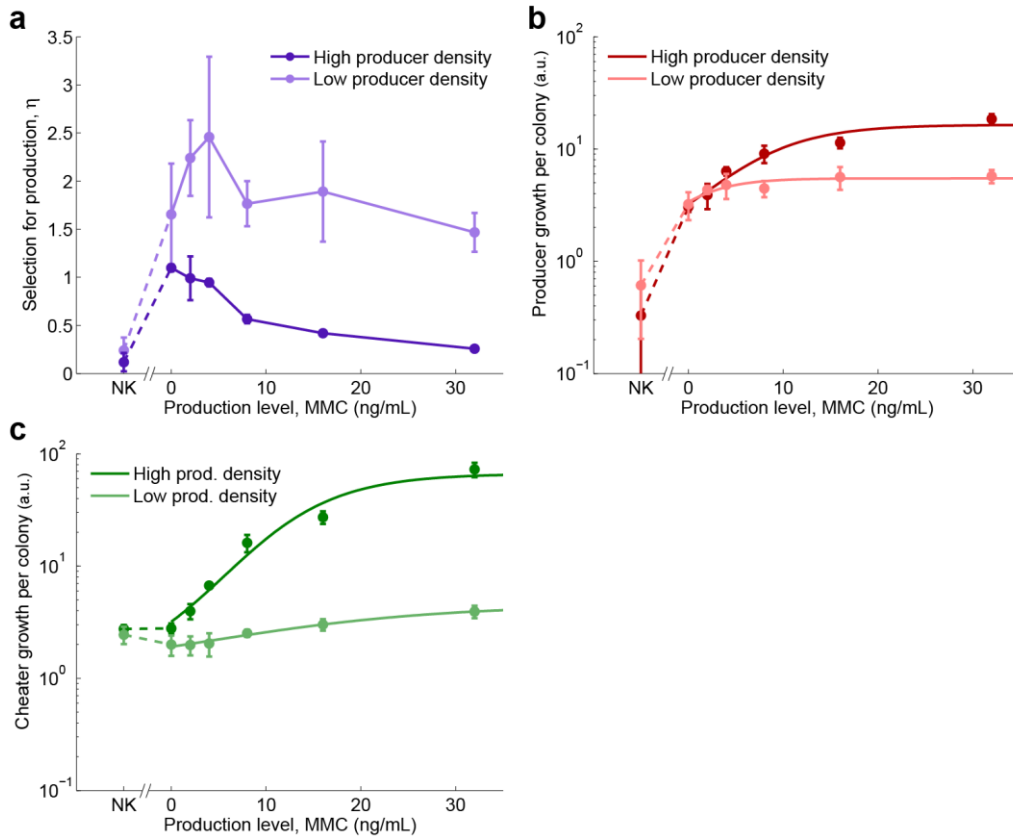

**Supplementary Figure 8. The advantage of producers over cheaters is maximized at an intermediate level of antibiotic production.** Data are as in Figure 4, but growth data was normalized by average seeding density instead of number of observed colonies per plate. **a**, Selection for production in three-way competitions as a function of varying levels of colicin induction via mitomycin C ( $[S]=2,000$  CFU/cm<sup>2</sup>; high density:  $[P]=[C]=20$  CFU/cm<sup>2</sup>, low density:  $[P]=[C]=2$  CFU/cm<sup>2</sup>; mean of 4 replicate plates for each point, error bars show s.d.). Left-most points represent no-killing (NK) controls, where the sensitive competitor was replaced with resistant. **b**, Mean growth (arbitrary units) of producer colonies increases monotonically with production level ( $n=4$ , error bars show s.d.). **c**, Mean growth (arbitrary units) of resistant colonies at low and high producer density for varying production levels ( $n=4$ , error bars show s.d.).

**Comment [y1]:** Add:  
a, b, c  
(a.u.)



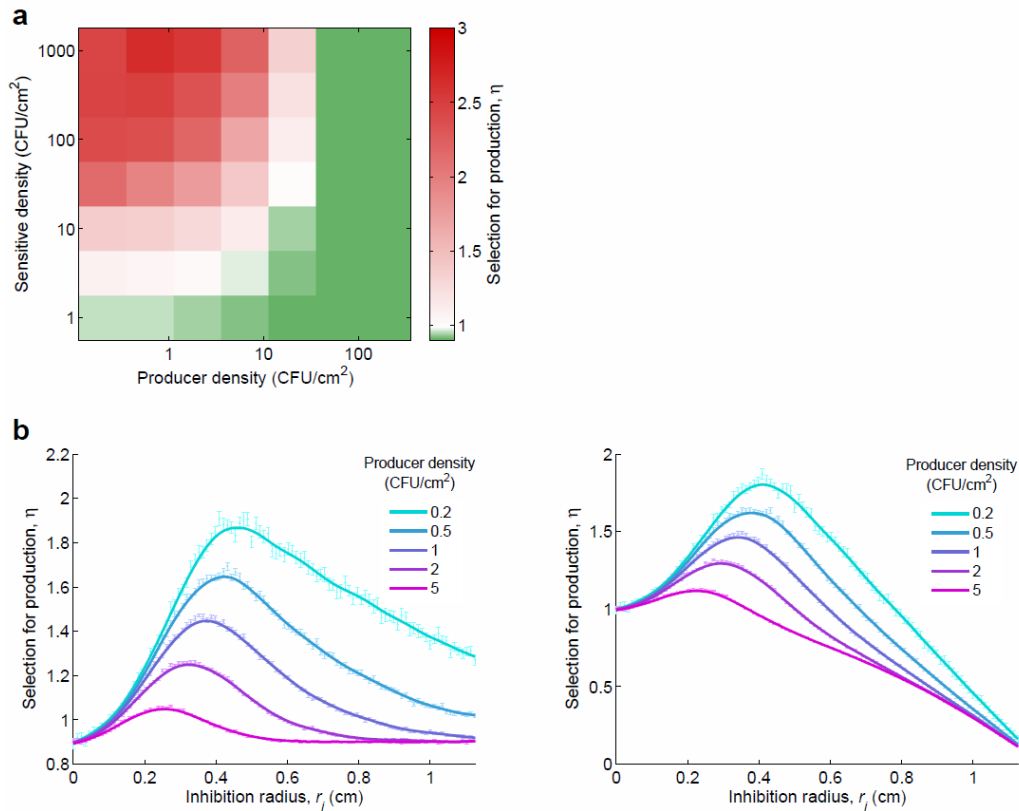

**Supplementary Figure 9. Fixed and variable-cost model simulations.** **a**, Varying-density simulations (as in Fig. 3b) with an additional 10% cost imposed on the final producer growth. **b**, Varying-inhibition simulations (as in Fig. 3c), showing mean selection for production as a function of inhibition radius ( $n=50$ , error bars are s.e.m.). Left, simulations with a 10% fixed cost on producer growth. Right, simulations with cost as a function of inhibition radius  $r_i$  (cost =  $0.7r_i^2$ ).

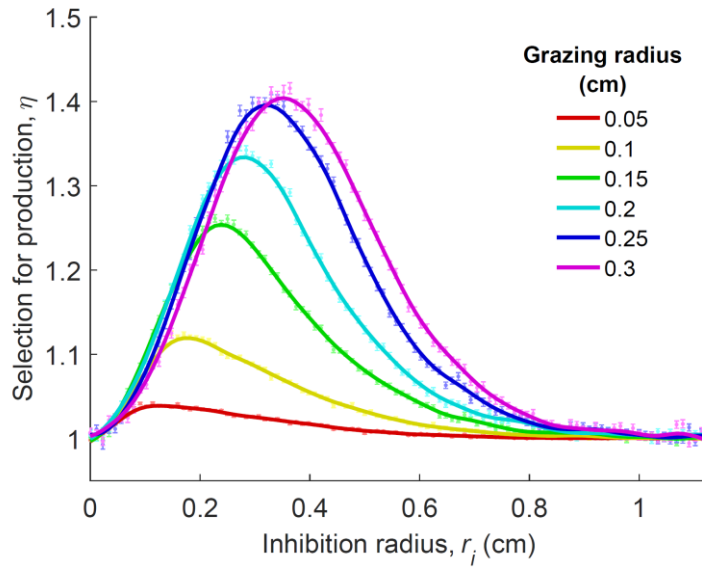

**Supplementary Figure 10. Location of selection peak depends on the grazing zone radius.** Simulations were run as in Figure 3c ( $[P] = [C] = 2 \text{ CFU/cm}^2$ ,  $n=50$  simulation runs per parameter set, error bars show s.e.m.).

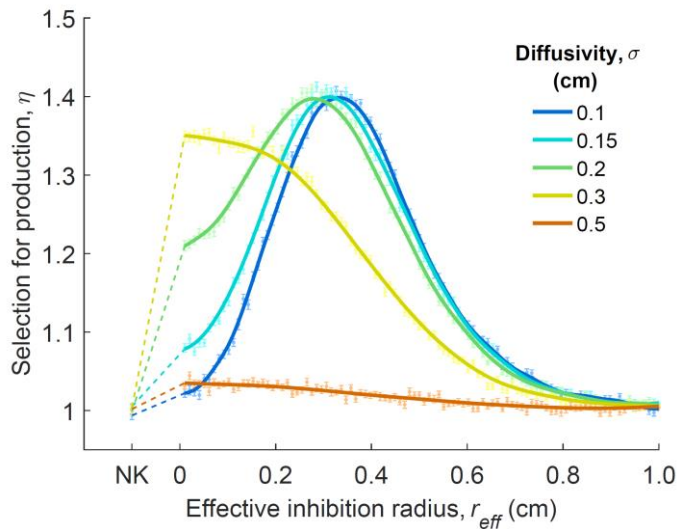

**Supplementary Figure 11. Shape and location of selection peak depends on antibiotic diffusivity in the cooperative model.** Selection as a function of the effective inhibition radius  $r_{eff}$ , the distance at which the antibiotic concentration equals  $MIC$  for an isolated producer colony. NK corresponds to no

production,  $c=0$ . Simulations were run as in Supplementary Figure S2 ( $[P] = [C] = 2 \text{ CFU/cm}^2$ ,  $n=50$  simulation runs per parameter set, error bars show s.e.m.).

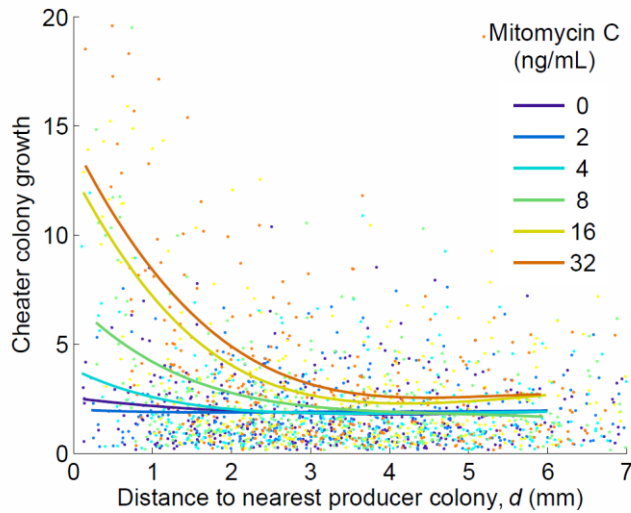

**Supplementary Figure 12. Growth of individual cheater colonies close to producer colonies increased with colicin induction.** Each series is combined data from 4 replicates where  $[P]=[C]=2 \text{ CFU/cm}^2$ ; solid lines are smoothed averages calculated by local linear regression.

## Supplementary Tables

**Supplementary Table 1. Parameters used for the simulations shown in Figure 3.** Simulations were performed as described in Methods.

| Parameter | Description                         | Value (Fig. 3a)   | Value (Fig. 3b)     | Value (Fig. 3c)     |
|-----------|-------------------------------------|-------------------|---------------------|---------------------|
| $r_i$     | Inhibition zone radius              | 0.25 cm           | 0.25 cm             | 0-1.125 cm          |
| $r_g$     | Grazing zone radius                 | 0.25 cm           | 0.25 cm             | 0.25 cm             |
| $A$       | Environment area                    | 2 cm <sup>2</sup> | 100 cm <sup>2</sup> | 100 cm <sup>2</sup> |
| $dx$      | Grid-cell length                    | 0.002 cm          | 0.02 cm             | 0.02 cm             |
| $P$       | Number of producer colonies         | 4                 | 10-10,000           | 20-500              |
| $C$       | Number of cheater colonies          | 4                 | 10-10,000           | 20-500              |
| $S$       | Number of sensitive colonies seeded | 1,000             | 100-100,000         | 1,000               |
| $k$       | Colony area scale factor            | 1.5               | N/A                 | 1.5                 |
